# Supplementary material
Source: PubMed Central journal article supplement (PMC3685498)
Supplement: NIHMS475709-supplement-1_si_001.pdf [file NIHMS475709-supplement-1_si_001.pdf]

## **Folded Conformation, Cyclic Pentamer, Nano-Structure and PAD4**

### **Binding Mode of YW3-56**

*Haimei Zhu,<sup>†</sup> Yuji Wang,<sup>†</sup> Yaonan Wang,<sup>†</sup> Shurui Zhao,<sup>†</sup> Ming Zhao,<sup>\*†</sup> Lin Gui,<sup>†</sup>*

*Wenyun Xu,<sup>†</sup> Xiangyun Amy Chen,<sup>‡</sup> Yanming Wang,<sup>\*\*</sup> and Shiqi Peng,<sup>\*†</sup>*

<sup>†</sup>College of Pharmaceutical Sciences, Capital Medical University, Beijing 100069, P.R. China.

<sup>‡</sup>Center for Eukaryotic Gene Regulation, Department of Biochemistry and Molecular Biology, Pennsylvania State University, University Park, PA 16802, USA.

## **Supporting Information**

### **1. Synthetic route**

To conveniently obtain YW3-56 (structure see Figure 1) the 4-step route used in the literature was followed (Wang, Y.; Li, P.; Wang, S.; Hu, J.; Chen, X. A.; Wu, J.; Fisher, M.; Oshaben, K.; Zhao, N.; Gu, Y.; Wang, D.; Chen, G.; Wang, Y. Anticancer PAD inhibitors regulate the autophagy flux and the mammalian target of rapamycin complex 1 activity. *J. Biol. Chem.* 2012, 17, 25941-25953), by changing the coupling reagent from HATU and DIPEA of step i to DCC and NMM, changing the reaction solvent from DMF of step i to THF, changing the coupling reagent from HATU and DIPEA of step ii to DCC and NMM, and changing the reaction solvent from DMF of step ii to a mixed solvent of THF and DMF (1:1). These changes benefitted the procedure, improved the purity and did not decrease the yield of YW3-56.

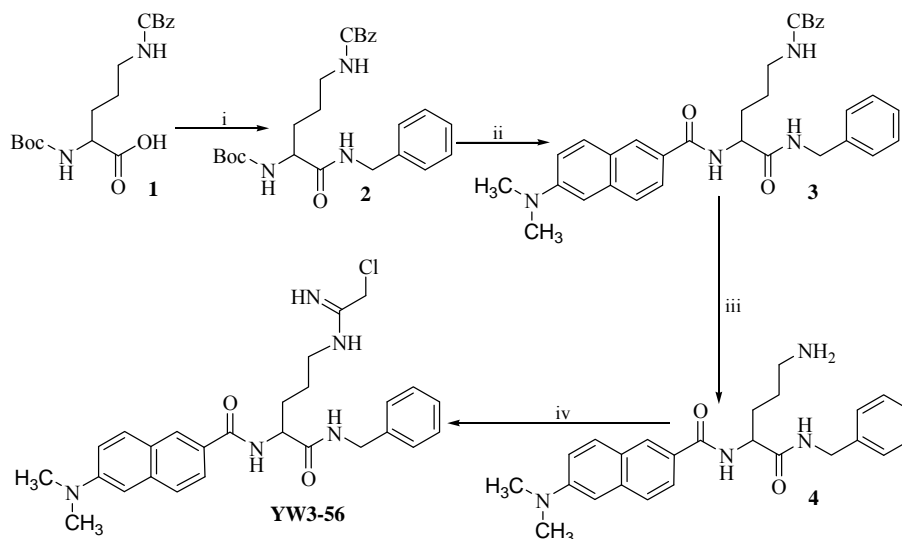

Figure 1. Synthetic route of N-S-1-[benzylcarbamoyl-4-(2-chloroacetamidobutyl)]-6-dimethylaminonaphthalene-2-carboxamide (YW3-56). I) Benzyl amine, DCC, NMM and THF; ii) Hydrogen chloride in ethyl acetate HCl/ETOAC; 6-(dimethylamino)-2-naphthoic acid, DCC, NMM, THF/DMF(1:1); iii)  $H_2$ , Pd/C (5%) and MeOH; iv)  $EtOC(=NH)CH_2Cl$ , TEA and MeOH.

## 2. $^1H$ NMR spectrum measurements

One-dimensional  $^1H$  NMR spectra were recorded on a Bruker 800 MHz spectrometer, ~5 mg of YW3-56 in 0.5 mL of deuterium dimethyl sulfoxide ( $DMSO-d_6$ ). The probe temperature was regulated to 298 K. The spectra were recorded using a simple pulse-acquire sequence zg30. Typical acquisition parameters consisted of 64 K points covering a sweep width of 16447 Hz, a pulse width (pw90) of 8.63  $\mu s$  and a total repetition time of 24 s to ensure full relaxation of the  $^1H$  resonances. Digital zero filling to 64 K and a 0.3 Hz exponential function were applied to the FID before Fourier transformation. The resonance at 2.5 ppm due to residual solvents, present as impurities ( $CD_2HSOCD_2H$ ), tetramethylsilane (TMS) was used as internal reference (Figure 2). Standard absorptive two-dimensional  $^1H$ - $^1H$

chemical shift correlation spectra (COSY) were acquired with the same spectrometer (Figure 3). Each spectra consisted of a matrix of 2 K (F2) by 0.5 K (F1) covering a sweep width of 9615.4 Hz. Before Fourier transformation, the matrix was zero filled to 1 K by 1 K and standard sinebell apodization functions were applied in both dimensions. Two-dimensional ROESY experiments were acquired in the phase-sensitive mode using the same spectrometer (Figure 4). Each spectra consisted of a matrix of 2 K (F2) by 1 K (F1) covering a sweep width of 9615.4 Hz. Spectra were obtained using spin-lock mixing periods of 200 ms. Before Fourier transformation, the matrix was zero filled to 1 K by 1 K and qsine apodization functions were applied in both dimensions.

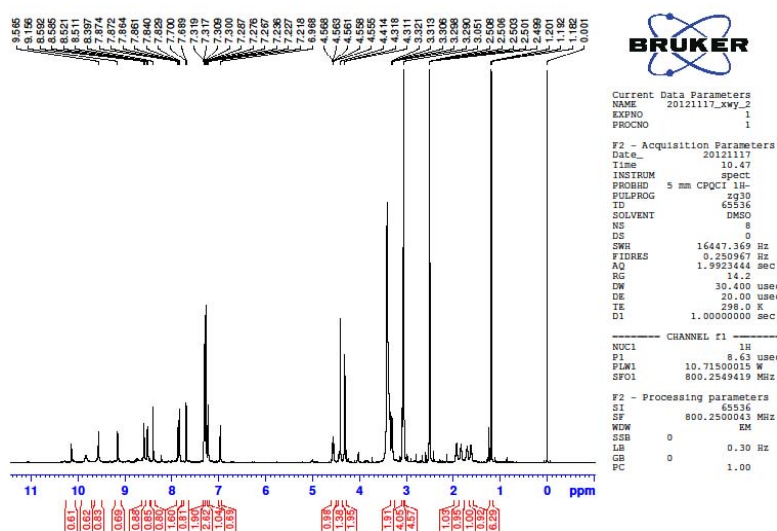

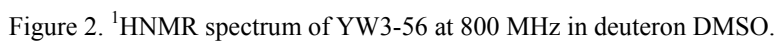

Figure 2. <sup>1</sup>HNMR spectrum of YW3-56 at 800 MHz in deuterion DMSO.

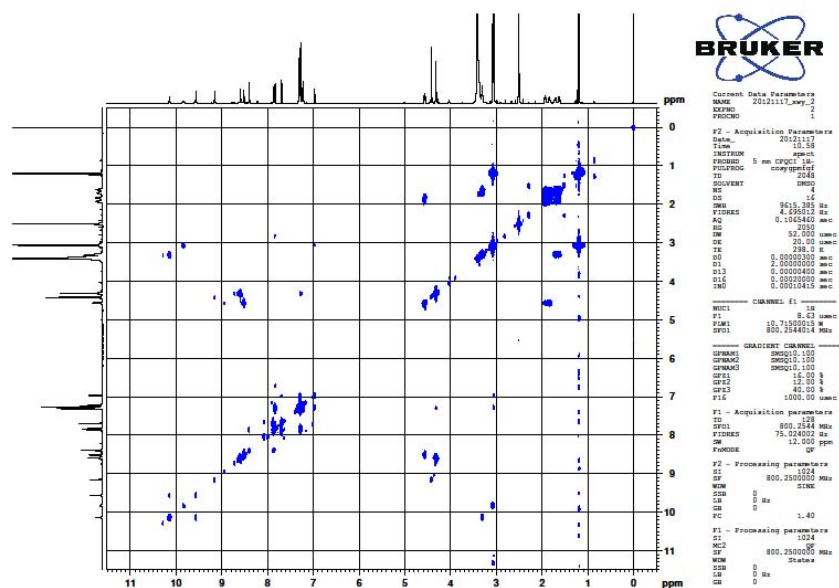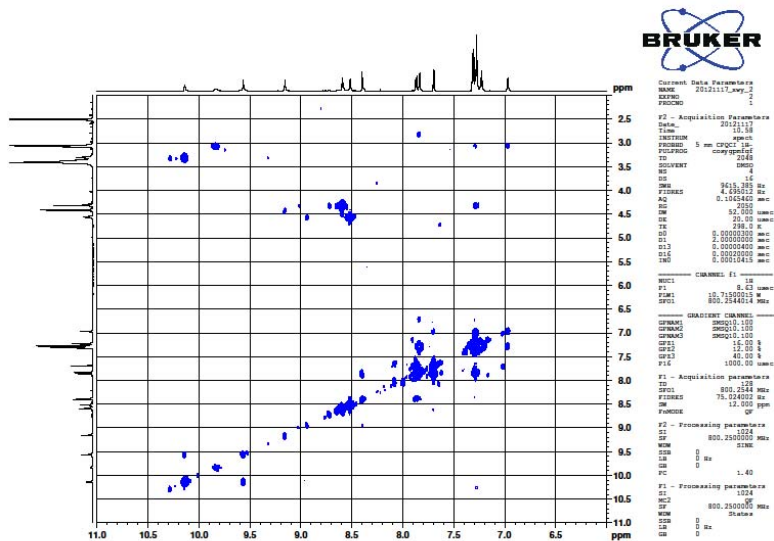



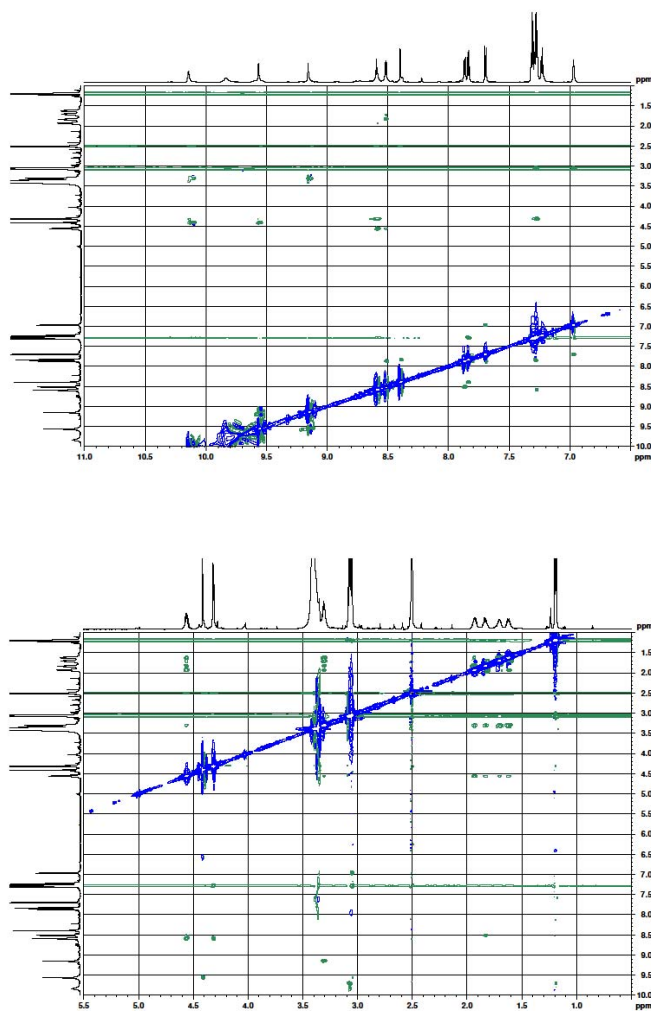

Figure 4. ROESY 2D NMR spectrum of YW3-56 at 800 MHz in deuterium DMSO.

### 3. Conformation simulation

The computer simulations were carried out in vacuum, water, and DMSO. As seen in Figure 5, the difference between the conformations is negligible.

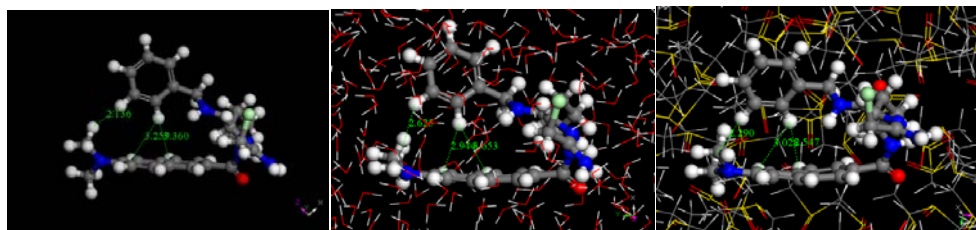

Figure 5. The conformation of YW3-56 sampled in vacuum, water, and DMSO using molecular

dynamics simulations.

**4. Another TEM image at 4 °C kept for one week which covers more large area**

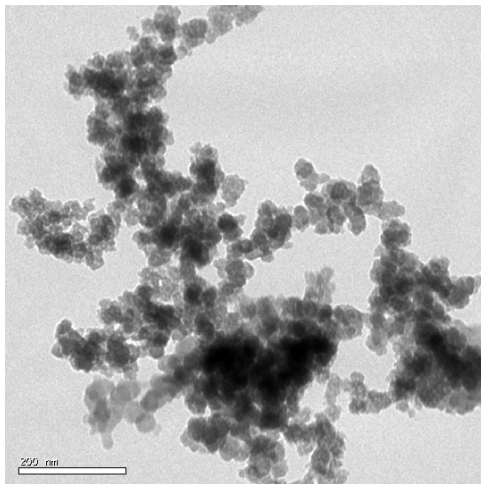

Figure 6. Another TEM image of YW3-56 in ethanol at 4 °C kept for one week.
